# Supplementary material
Source: MDPI journal article supplement (https://www.mdpi.com/2305-6320/8/7/37)
Supplement: s1 [file s1]

# Supplementary Materials: Effectiveness of Yoga Lifestyle on Lipid Metabolism in a Vulnerable Population—A Community Based Multicenter Randomized Controlled Trial

Raghuram Nagarathna, Saurabh Kumar, Akshay Anand, Ishwara N. Acharya, Amit Kumar Singh, Suchitra S. Patil, Ramesh H Latha, Purnima Datey and Hongasandra Ramarao Nagendra

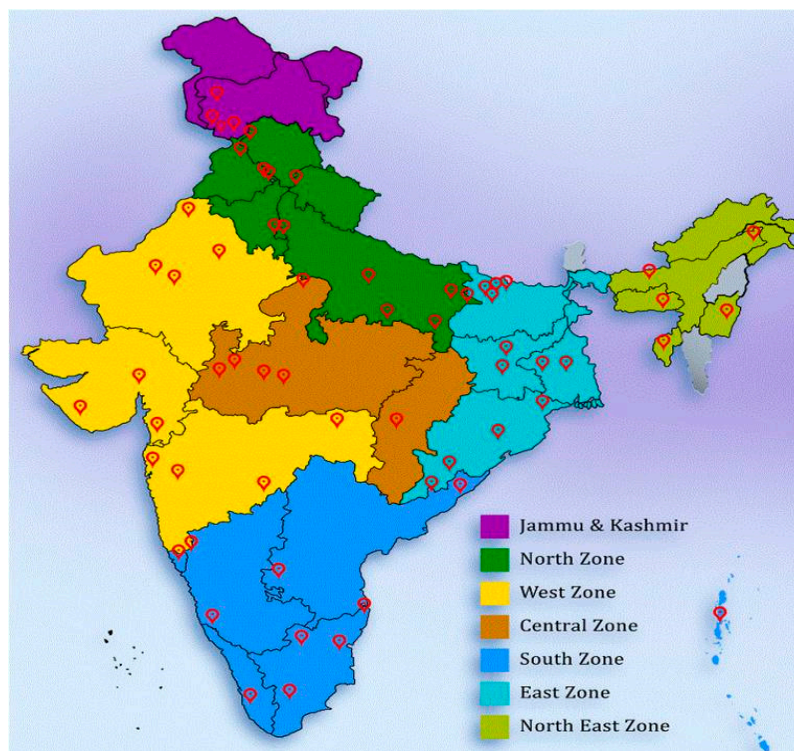

**Figure S1.** Map of India showing the geographic spread of the intervention sites (reusing the figure after permission (Nagendra et al., 2019)).

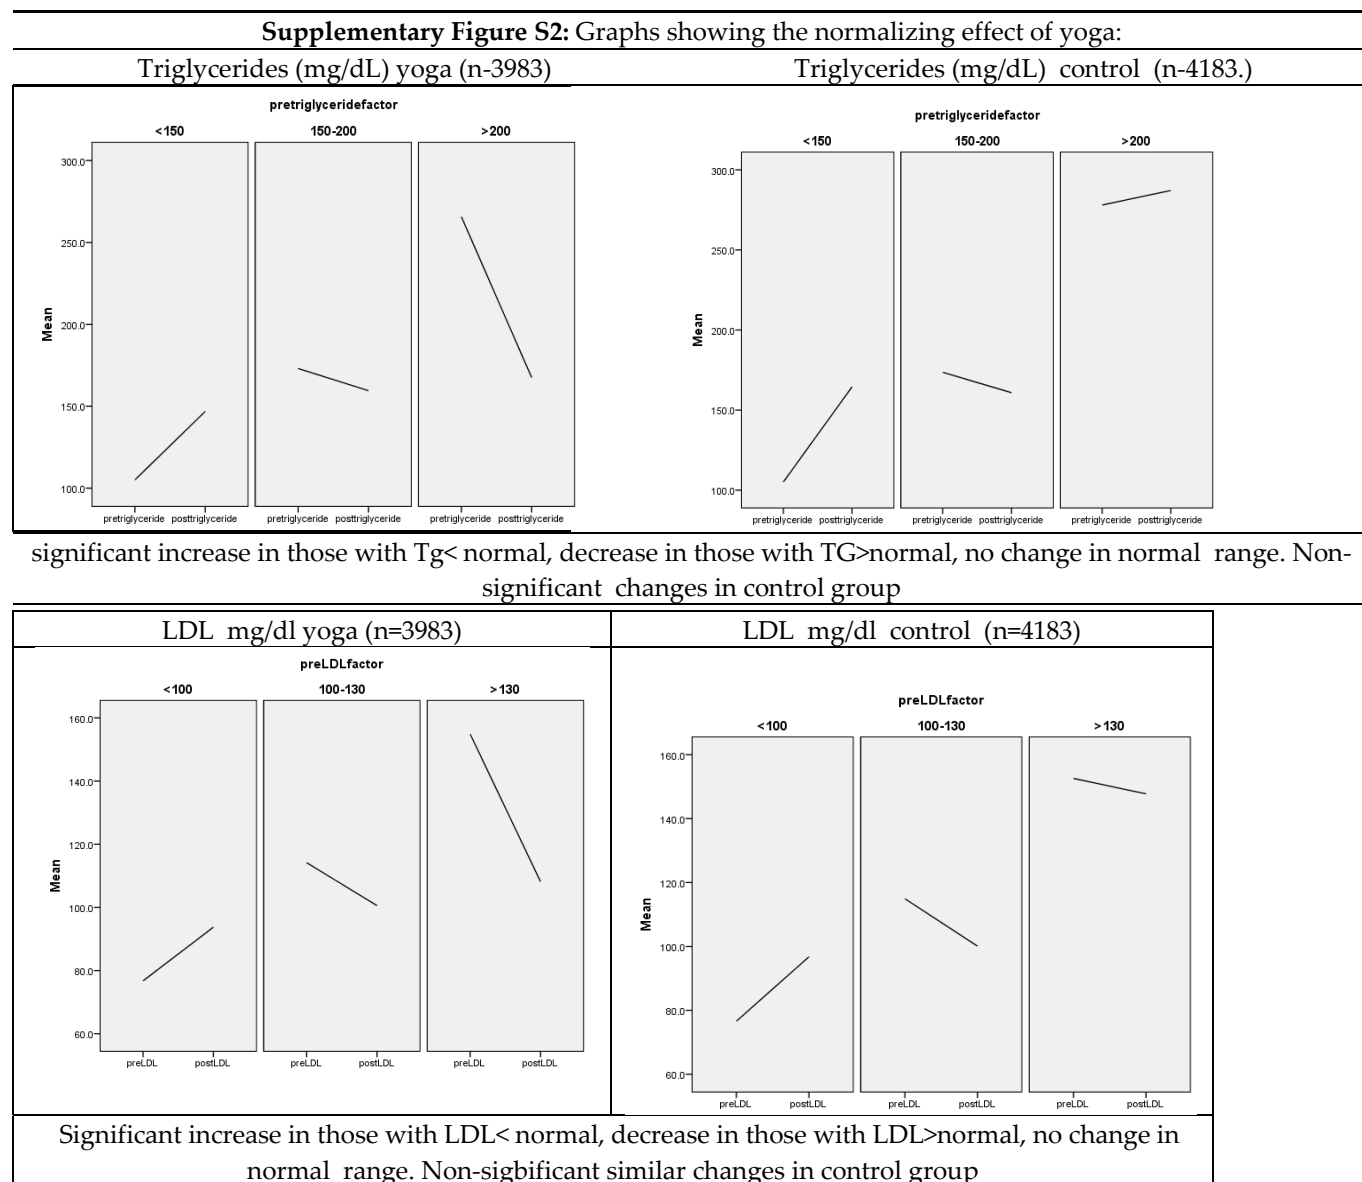

**Figure S2.** Graphs showing the normalizing effect of yoga.

**Table S1.** Validated diabetes yoga lifestyle protocol for prediabetes and uncomplicated diabetes.

| Table S1. Validated yoga lifestyle protocol for prediabetes and uncomplicated diabetes |                                                                                                                                                         |            |                                   |
|----------------------------------------------------------------------------------------|---------------------------------------------------------------------------------------------------------------------------------------------------------|------------|-----------------------------------|
| S. No                                                                                  | Name of Practice                                                                                                                                        | Time (min) | Benefits                          |
| 1                                                                                      | Opening Prayer: <i>Asatoma Sad gamaya</i><br><i>Tamaso ma Jyotir - gamaya</i><br><i>Mrtyor-Maa Amrtamgamaya</i><br><i>Om Shaantih Shaantih Shaantih</i> | 2          | Enhances the benefits of practice |
|                                                                                        | Meaning: From ignorance lead me to truth; from darkness, lead me to light; from death, lead me to immortality; Om peace, peace, peace.                  |            |                                   |

|   |                                                                                                                                                                                                                                                                                                                                                                                                                                                                                                                                                                                                                                                                                                                                                                                                                                                                                                                    |    |                                                                                          |
|---|--------------------------------------------------------------------------------------------------------------------------------------------------------------------------------------------------------------------------------------------------------------------------------------------------------------------------------------------------------------------------------------------------------------------------------------------------------------------------------------------------------------------------------------------------------------------------------------------------------------------------------------------------------------------------------------------------------------------------------------------------------------------------------------------------------------------------------------------------------------------------------------------------------------------|----|------------------------------------------------------------------------------------------|
| 2 | Loosening Exercises (preparatory <i>Sukshma Vyayamas</i> and <i>Shithilikarna</i> practices)                                                                                                                                                                                                                                                                                                                                                                                                                                                                                                                                                                                                                                                                                                                                                                                                                       | 6  | Warms up the body                                                                        |
|   | <i>Urdhava Hastashvasan</i> (upward tree position)<br>(hand stretching breathing 3 rounds at 90°, 135° and 180° each)<br><i>Kati-Shakti Vikasaka</i> (3 rounds)<br>a). Forward and Backward Bending<br>b). Twisting<br><i>Sarvangha Pushti</i> (Rotatory circular movements)<br>(3 rounds clockwise, 3 rounds anticlockwise)                                                                                                                                                                                                                                                                                                                                                                                                                                                                                                                                                                                       |    |                                                                                          |
| 3 | <i>Surya Namaskara</i> (SN) (sun salutation)<br>10 step fast <i>Surya Namaskara</i> (fast sun salutation) 6 rounds<br>12 step slow <i>Surya Namaskara</i> (slow sun salutation) 1 round<br>Modified version Chair SN 7 rounds                                                                                                                                                                                                                                                                                                                                                                                                                                                                                                                                                                                                                                                                                      | 9  | reinforces the complete system/body                                                      |
| 4 | <i>Asanas</i> (body pose/posture) (1min per <i>asana</i> )<br>1. Standing Position (1min per <i>asana</i> )<br><i>Trikonasana</i> (extended triangle pose),<br><i>Parvritta Trikonasana</i> (revolved triangle pose),<br><i>Prasarita Padhastasana</i> (wide-legged forward bend)<br>2. Supine Position<br><i>Jatara Parivartanasana</i> (master revolved abdomen pose)<br><i>Pawanmuktasana</i> (wind-relieving pose),<br><i>Viparitarikarani</i> (upside-down pose)<br>3. Prone Position<br><i>Bhujangasana</i> (cobra pose),<br><i>Dhanurasana</i> (bow pose),<br>4. Sitting Position<br><i>Mandukasana</i> (frog pose),<br><i>Vakrasana/Ardhamatsayendrasana</i> (half spinal twist pose),<br><i>Paschimatanasana</i> (seated forward bend),<br><i>Ardha Ushtrasana</i> (half camel pose)<br>At the end, relaxation with abdominal breathing in supine position ( <i>vishranti</i> ), 10-15 rounds (2 minutes) | 15 | brings peace to the mind and body, also prepares the body for deeper spiritual practices |
| 5 | <i>Kriya</i> (outward physical manifestation)<br><i>Agnisara</i> (abdomen churning):1 minute<br><i>Kapalabhati</i> (forehead Shining Breathing Technique) (@60 breaths per minute for 1 minute followed by rest for 1 minute)                                                                                                                                                                                                                                                                                                                                                                                                                                                                                                                                                                                                                                                                                      | 3  | increases the internal energy, and improves circulation respectively                     |
| 6 | <i>Pranayama</i> (breathing techniques)<br><i>Nadishuddhi</i> (alternate nostril breathing) (for 6 minutes, with <i>antarkumbhak</i> (internal breath retention) and <i>Jalandhar bandh</i> (chin lock) (for 2 seconds)<br><i>Bhramari</i> (humming bee breathing) 3 minutes                                                                                                                                                                                                                                                                                                                                                                                                                                                                                                                                                                                                                                       | 9  | acts as scavenger by cleaning the nadis/channels                                         |
| 7 | Meditation (for Stress, for deep relaxation and silencing of mind)<br>Cyclic Meditation                                                                                                                                                                                                                                                                                                                                                                                                                                                                                                                                                                                                                                                                                                                                                                                                                            | 15 | concentration, relaxation and silencing of the mind                                      |
| 8 | Resolve ( <i>I am completely healthy</i> )                                                                                                                                                                                                                                                                                                                                                                                                                                                                                                                                                                                                                                                                                                                                                                                                                                                                         |    |                                                                                          |
| 9 | Closing Prayer: <i>Sarve Bhavantu Sukhina</i><br><i>Sarve Santu Niramayaah</i><br><i>Sarve Bhadrani Pasyanttu</i>                                                                                                                                                                                                                                                                                                                                                                                                                                                                                                                                                                                                                                                                                                                                                                                                  | 1  | Instills feeling of human brotherhood                                                    |

---

|                                                                                                                                                                                                                            |         |
|----------------------------------------------------------------------------------------------------------------------------------------------------------------------------------------------------------------------------|---------|
| <i>Maa Kashcid-Duhkha-Bhag-Bhavet</i><br><i>Om Shaantih Shaantih Shaantih</i><br>Meaning: Let all be happy, free from diseases. Let all align<br>with reality, let no-one suffer from miseries. Om peace,<br>peace, peace. |         |
| Total duration                                                                                                                                                                                                             | 60 mins |

---
